# Supplementary material for: Hydrophobic and Luminescent Polydimethylsiloxane PDMS-Y2O3:Eu3+ Coating for Power Enhancement and UV Protection of Si Solar Cells
Source: MDPI journal article supplement (doi:10.3390/nano14080674), 2024-04-12
Supplement: s1 [file s1]

# Supporting Information

## Hydrophobic and luminescent polydimethylsiloxane PDMS- $\text{Y}_2\text{O}_3:\text{Eu}^{3+}$ coating for power enhancement and UV protection of Si solar cells

Darya Goponenko<sup>1, @</sup>, Kamila Zhumanova<sup>1, @</sup>, Sabina Shamarova<sup>1</sup>, Zhuldyz Yelzhanova<sup>2</sup>, Annie Ng<sup>2</sup>, and Timur Sh. Atabaev<sup>1, \*</sup>

1) Department of Chemistry, School of Sciences and Humanities, Nazarbayev University, Astana 010000, Kazakhstan

2) Department of Electrical and Computer Engineering, School of Engineering and Digital Sciences, Nazarbayev University, Astana, Kazakhstan

@ Equal contribution

\* Correspondence: timur.atabaev@nu.edu.kz; Tel.: (+7 7172 70 60 26)

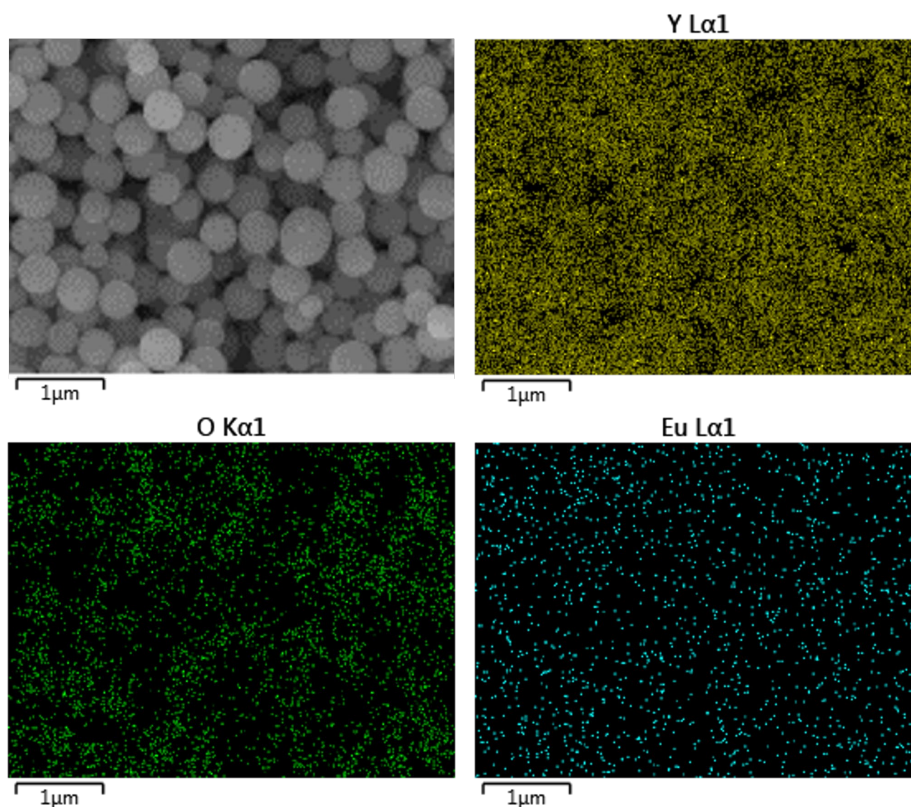

Figure S1. EDS elemental mapping of  $\text{Y}_2\text{O}_3:\text{Eu}^{3+}$  particles.

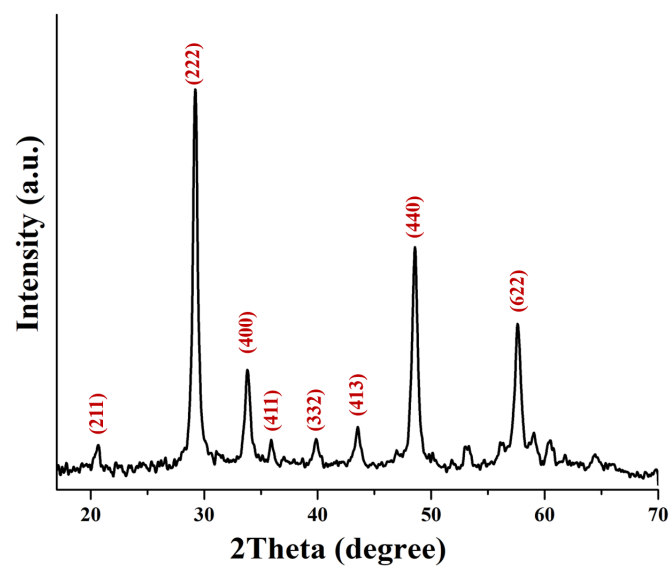

**Figure S2.** XRD pattern of  $\text{Y}_2\text{O}_3:\text{Eu}^{3+}$  particles.

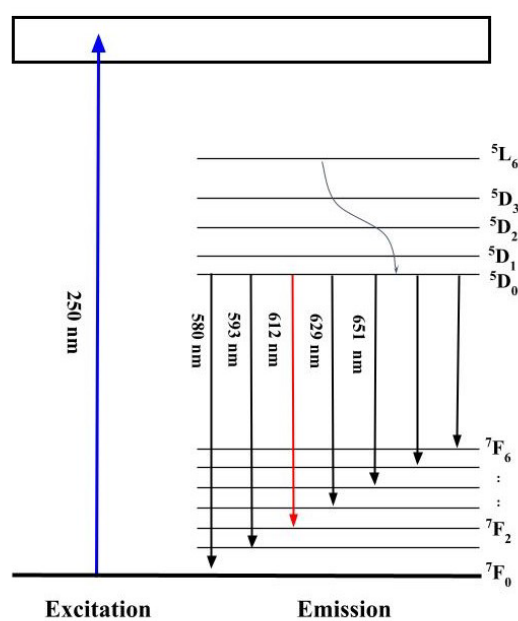

**Figure S3.** Schematic representation of transitions within  $\text{Eu}^{3+}$

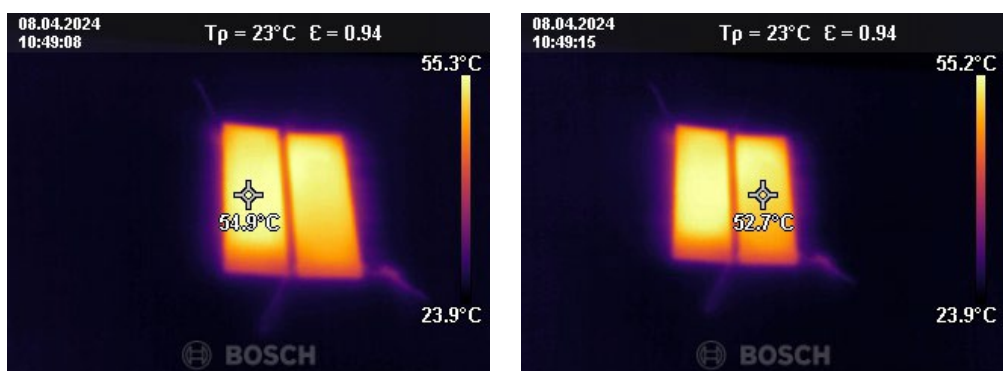

**Figure S4.** Heating of Si cells within 5 min under simulated solar light illumination. Uncoated Si cell reached ~ 54.9 °C, while coated Si cell reached ~ 52.7 °C under the same conditions. Temperature was measured using Bosch GTC 600 C thermal imaging camera.
